# Supplementary material for: An Acidic Loop and Cognate Phosphorylation Sites Define a Molecular Switch That Modulates Ubiquitin Charging Activity in Cdc34-Like Enzymes
Source: PubMed Central journal article supplement (PMC3102755; doi:10.1371/journal.pcbi.1002056), 2011-05-26

Figure 1. Intra-family multiple sequence alignment. In each alignment the families are indicated by ‘\_x’.

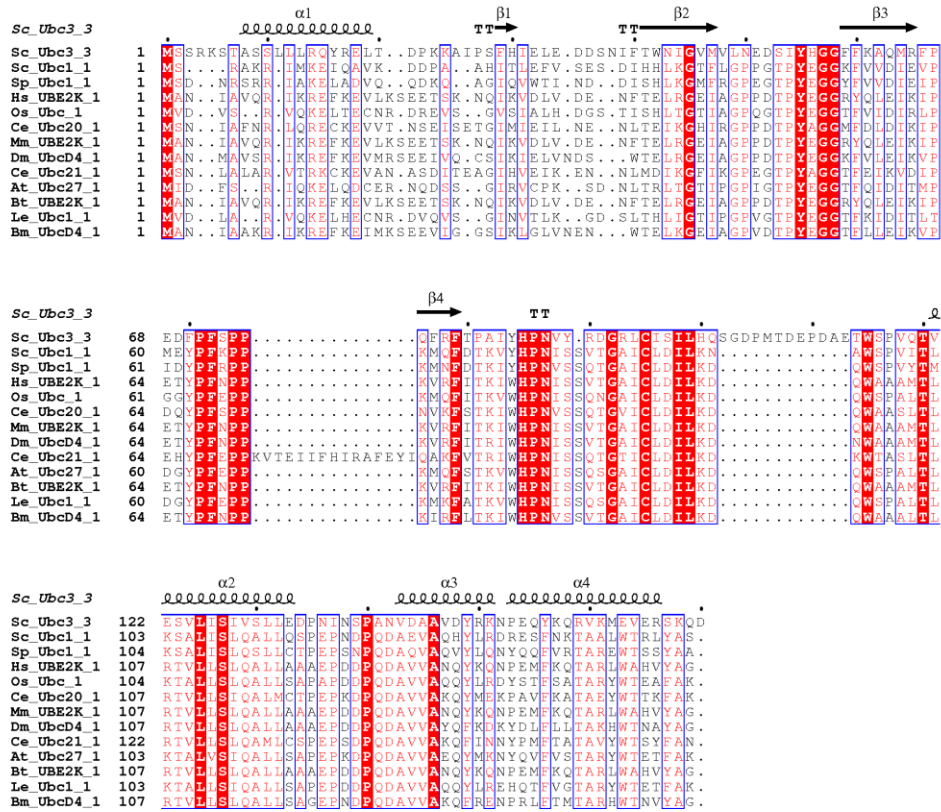

$\alpha 1$   $\beta 1$   $\beta 2$   
*Sc\_Ubc3\_3* . . . . . QQQQQQQQ . . . . . TT  $\rightarrow$  . . . . . TT  $\rightarrow$  . . . . .  
*Sc\_Ubc3\_3* 1 MS SRKS TASS L LRQY RELT DPKA I T SFH I E L E D S N I F T W N I G V M V I N E D S I Y H G C . . . . . F  
*Ce\_Ubc1\_2* 1 M P T . . P S R R R L M R D F K R L Q D D P . . . . . A G V S G A P T E D . N I L T W E A I I F G P . Q E T P F E D G . . . . . T  
*Hs\_UBE2A\_2* 1 M S T . . P A R R R L M R D F K R L Q D D P . . . . . A G V S G A P S E N . N I M W W N A V I F G P . E G T P F E D G . . . . . T  
*Dm\_UbcD6\_2* 1 M S T . . P A R R R L M R D F K R L Q D D P . . . . . T G V S G A P T D N . N I M I W N A V I F G P . H D T P F E D G . . . . . T  
*At\_Ubc1\_2* 1 M S T . . P A R R R L M R D F K R L Q D D P . . . . . A G I S G A P Q D N . N I M L W N A V I F G P . D D T P W D G G . . . . . T  
*At\_Ubc3\_2* 1 M P T . . P A R R R L M W D F K R L Q D D P . . . . . V G I S G A P Q D N . N I M H W N A I I F G P . E D T P W D G G . . . . . T  
*Sc\_Ubc2\_2* 1 M S T . . P A R R R L M R D F K R M Q D D P . . . . . F G V S G A S F P D . N V M W W N A M I I G P . A D T P F E D G . . . . . T  
*Nh\_Rad6\_2* 1 M S T . . A A R R R L M R D F K R M Q D D P . . . . . A G V S A S F V S D . N V M T W N A V I I G P . A D T P F E D G . . . . . T  
*Sp\_Ubc2\_2* 1 M S T . . T A R R R L M R D F K R M Q D D P . . . . . A G V S A S F V S D . N V M L W N A V I I G P . A D T P F E D G . . . . . T  
*Hs\_UBE2B\_2* 1 M S T . . P A R R R L M R D F K R L Q D D P . . . . . V G V S G A P S E N . N I M W W N A V I F G P . E G T P F E D G . . . . . T  
*Mm\_UBE2A\_2* 1 M S T . . P A R R R L M R D F K R L Q D D P . . . . . A G V S G A P S E N . N I M W W N A V I F G P . E G T P F E D G . . . . . T  
*Mm\_UBE2B\_2* 1 M S T . . P A R R R L M R D F K R L Q D D P . . . . . V G V S G A P S E N . N I M W W N A V I F G P . E G T P F E D G . . . . . T  
*At\_Ubc2\_2* 1 M S T . . P A R R R L M R D F K R L Q D D P . . . . . A G I S G A P Q D N . N I M L W N A V I F G P . D D T P W D G G . . . . . T  
*Rn\_Ubc2A\_2* 1 M S T . . P A R R R L M R D F K R L Q D D P . . . . . A G V S G A P S E N . N I M W W N A V I F G P . E G T P F E D G T H V E T T G Q L G T  
*Rn\_Ubc2B\_2* 1 M S T . . P A R R R L M R D F K R L Q D D P . . . . . V G V S G A P S E N . N I M W W N A V I F G P . E G T P F E D G . . . . . T  
*Oc\_Ubc2B\_2* 1 M S T . . P A R R R L M R D F K R L Q D D P . . . . . V G V S G A P S E N . N I M W W N A V I F G P . E G T P F E D G . . . . . T  
*Ms\_Ubc2\_2* 1 M S T . . P A R R R L M R D F K R L Q D D P . . . . . A G I S G A P Q D N . N I M L W N A V I F G P . D D T P W D G G . . . . . T  
*Ta\_Ubc2\_2* 1 M S T . . P A R R R L M R D F K R L Q D D P . . . . . A G I S G A P H D N . N I T L W N A V I F G P . D D T P W D G G . . . . . T  
*Nc\_mus8\_2* 1 M S T . . A A R R R L M R D F K R M Q D D P . . . . . A G V S A S F V P D . N V M T W N A V I I G P . A D T P F E D G . . . . . T  
*En\_Ubc2\_2* 1 M S T . . S A R R R L M R D F K R M Q D D P . . . . . A G V S A S F V A D . N V M T W N A V I I G P . A D T P F E D G . . . . . T  
*Gg\_Ubc\_2* 1 M S T . . P A R R R L M R D F K R L Q D D P . . . . . A G V S G A P S E N . N I M W W N A V I F G P . E G T P F E D G . . . . . T  
*Nt\_Ubc1\_2* 1 M S T . . P A R R R L M R D F K R L Q D D P . . . . . A G I S G A P Y D N . N I M L W N A V I F G P . D D T P W D G G . . . . . T  
*Nt\_Ubc2\_2* 1 M S T . . P A R R R L M R D F K R L Q D D P . . . . . A G I S G A P Y D N . N I M L W N A V I F G P . D D T P W D G G . . . . . T

$\beta 3$   $\beta 4$   $\alpha 2$   
*Sc\_Ubc3\_3* . . . . .  $\beta 3$  . . . . .  $\beta 4$  . . . . . TT . . . . . QQQQQQQQ  
*Sc\_Ubc3\_3* 60 F K A Q M R F E E D P P P P P F R F P P A I Y H P N V Y D G R L C I S I L H Q S G D P M I D E P D A E T W S P V Q I V E S V L I S I V  
*Ce\_Ubc1\_2* 53 F K L S L E F E E Y P N K P P T V R F V S K M F H P N V Y A D G S I C L D I L Q N . . . . . R W S P T Y D V A A I L S I Q  
*Hs\_UBE2A\_2* 53 F K L T I E F E E Y P N K P P T V R F V S K M F H P N V Y A D G S I C L D I L Q N . . . . . R W S P T Y D V S S I L S I Q  
*Dm\_UbcD6\_2* 53 F K L T I E F E E Y P N K P P T V R F V S K M F H P N V Y A D G S I C L D I L Q N . . . . . R W S P T Y D V S A I L S I Q  
*At\_Ubc1\_2* 53 F K L S L Q F E E D Y P N K P P T V R F V S R M F H P N V Y A D G S I C L D I L Q N . . . . . Q W S P I Y D V A A I L S I Q  
*At\_Ubc3\_2* 53 F K L T L H F E E D Y P N K P P T V R F V S R M F H P N V Y A D G S I C L D I L Q N . . . . . Q W S P I Y D V A A I L S I Q  
*Sc\_Ubc2\_2* 53 F R L L L E F E E Y P N K P P H V K F F S E M F H P N V Y A T G E I C L D I L Q N . . . . . R W S P T Y D V A S I L S I Q  
*Nh\_Rad6\_2* 53 F R L V M H F E E Q Y P N K P P Q V K F F S E M F H P N V Y A T G E I C L D I L Q N . . . . . R W S P T Y D V A A I L S I Q  
*Sp\_Ubc2\_2* 53 F K L V I S F E E Q Y P N K P P L V K F F S T M F H P N V Y A T G E I C L D I L Q N . . . . . R W S P T Y D V A A I L S I Q  
*Hs\_UBE2B\_2* 53 F K L V I E F E E Y P N K P P T V R F V S K M F H P N V Y A D G S I C L D I L Q N . . . . . R W S P T Y D V S S I L S I Q  
*Mm\_UBE2A\_2* 53 F K L T I E F E E Y P N K P P T V R F V S K M F H P N V Y A D G S I C L D I L Q N . . . . . R W S P T Y D V S S I L S I Q  
*Mm\_UBE2B\_2* 53 F K L V I E F E E Y P N K P P T V R F V S K M F H P N V Y A D G S I C L D I L Q N . . . . . R W S P T Y D V S S I L S I Q  
*At\_Ubc2\_2* 53 F K L S L Q F E E D Y P N K P P T V R F V S R M F H P N V Y A D G S I C L D I L Q N . . . . . Q W S P I Y D V A A I L S I Q  
*Rn\_Ubc2A\_2* 63 F K L T I E F E E Y P N K P P T V R F V S K M F H P N V Y A D G S I C L D I L Q N . . . . . R W S P T Y D V S S I L S I Q  
*Rn\_Ubc2B\_2* 53 F K L V I E F E E Y P N K P P T V R F V S K M F H P N V Y A D G S I C L D I L Q N . . . . . R W S P T Y D V S S I L S I Q  
*Oc\_Ubc2B\_2* 53 F K L V I E F E E Y P N K P P T V R F V S R M F H P N V Y A D G S I C L D I L Q N . . . . . R W S P T Y D V S S I L S I Q  
*Ms\_Ubc2\_2* 53 F K L S L Q F E E D Y P N K P P T V R F V S R M F H P N V Y A D G S I C L D I L Q N . . . . . Q W S P I Y D V A A I L S I Q  
*Ta\_Ubc2\_2* 53 F K L T L Q F E E D Y P N K P P T V R F V S R M F H P N V Y A D G S I C L D I L Q N . . . . . Q W S P I Y D V A A I L S I Q  
*Nc\_mus8\_2* 53 F R L V M H F E E Q Y P N K P P P V K F F S E M F H P N V Y A T G E I C L D I L Q N . . . . . R W S P T Y D V A A I L S I Q  
*En\_Ubc2\_2* 53 F R L V M H F E E Q Y P N K P P P V K F F S Q M F H P N V Y A T G E I C L D I L Q N . . . . . R W S P T Y D V A A I L S I Q  
*Gg\_Ubc\_2* 53 F K L T I E F E E Y P N K P P T V R F V S K M F H P N V Y A D G S I C L D I L Q N . . . . . R W S P T Y D V S S I L S I Q  
*Nt\_Ubc1\_2* 53 F K L T L Q F E E D Y P N K P P T V R F V S R M F H P N V Y A D G S I C L D I L Q N . . . . . Q W S P I Y D V A A I L S I Q  
*Nt\_Ubc2\_2* 53 F K L T L Q F E E D Y P N K P P T V R F V S R M F H P N V Y A D G S I C L D I L Q N . . . . . Q W S P I Y D V A A I L S I Q

$\alpha 3$   $\alpha 4$   
*Sc\_Ubc3\_3* . . . . . QQQQ . . . . . QQQQQQQQ . . . . . QQQQQQQQ . . . . . QQQQQQ  
*Sc\_Ubc3\_3* 130 S L I E P N F N S A N V D A A V D Y R K N F E C Y K O R V K M B V E R S K Q D .  
*Ce\_Ubc1\_2* 111 S L I D E P N F N S A N S L A A Q L Y Q E N R R E Y E K R V Q Q I V E S W L N F  
*Hs\_UBE2A\_2* 111 S L I D E P N F N S A N S Q A A Q L Y Q E N K R E Y E K R V S A I V E S W R D C  
*Dm\_UbcD6\_2* 111 S L I S D P N F N S A N S T A A Q L Y K E N R R E Y E K R V K A Q V E S F I D .  
*At\_Ubc1\_2* 111 S L I C D P N F N S A N S E A A R M Y S E S K R E Y N R R V R D V V E S W T A D  
*At\_Ubc3\_2* 111 S L I C D P N F N S A N S E A A R L F S E N K R E Y N R K V I E I V E S Y V . .  
*Sc\_Ubc2\_2* 111 S L F N D P N F N S A N S A A A L F K D H R S Q Y V K R V K E T V E S W E D D  
*Nh\_Rad6\_2* 111 S L I N D P N T G S A N S V E A S N L Y K D N R K E Y I K R V R E T V E S W E D .  
*Sp\_Ubc2\_2* 111 S L I N D P N T G S A N S E A A Q L H R E N K K E Y V R R V R K T V E S W E S .  
*Hs\_UBE2B\_2* 111 S L I D E P N F N S A N S Q A A Q L Y Q E N K R E Y E K R V S A I V E S W N D S  
*Mm\_UBE2A\_2* 111 S L I D E P N F N S A N S Q A A Q L Y Q E N K R E Y E K R V S A I V E S W R D C  
*Mm\_UBE2B\_2* 111 S L I D E P N F N S A N S Q A A Q L Y Q E N K R E Y E K R V S A I V E S W N D S  
*At\_Ubc2\_2* 111 S L I C D P N F N S A N S E A A R M F S E S K R E Y N R R V R E V V E S W T A D  
*Rn\_Ubc2A\_2* 121 S L I D E P N F N S A N S Q A A Q L Y Q E N K R E Y E K R V S A I V E S W R D C  
*Rn\_Ubc2B\_2* 111 S L I D E P N F N S A N S Q A A Q L Y Q E N K R E Y E K R V S A I V E S W N D S  
*Oc\_Ubc2B\_2* 111 S L I D E P N F N S A N S Q A A Q L Y Q E N K R E Y E K R V S A I V E S W N D S  
*Ms\_Ubc2\_2* 111 S L I C D P N F N S A N S E A A R M F S E N K R E Y N R R V R E V V E S W T A D  
*Ta\_Ubc2\_2* 111 S L I C D P N F N S A N S E A A R M Y S E N K R E Y N R K V R E V V E S W T A D  
*Nc\_mus8\_2* 111 S L I N D P N T G S A N S V E A S N L Y K D N R K E Y I K R V R E T V E S W E D .  
*En\_Ubc2\_2* 111 S L I N D P N T G S A N S V E A S N L Y R D N R K E Y I K R V R E T V E S W E E .  
*Gg\_Ubc\_2* 111 S L I D E P N F N S A N S Q A A Q L Y Q E N K R E Y E K R V S A I V E S W R D C  
*Nt\_Ubc1\_2* 111 S L I C D P N F N S A N S E A A R M F S E N K R E Y N R K V R E T V E S W T A D  
*Nt\_Ubc2\_2* 111 S L I C D P N F N S A N S E A A R M F S E N K R E Y N R K V R E T V E S W T A D



|               |    | β4        | TT         |    | α2    |   |       |         |               |             |            |     |       |     |     |
|---------------|----|-----------|------------|----|-------|---|-------|---------|---------------|-------------|------------|-----|-------|-----|-----|
| Sc_Ubc3_3     |    |           |            |    | ..... |   |       |         |               |             |            |     |       |     |     |
| 67            | PE | DFFPSP    | QFRFTPAIY  | HN | NY    | R | DGRIC | TSILH   | QSGDPMIDEPDAE | TWSPVQTVESV | L          | IST | VSLLE | D   | P   |
| Hs_Ubc2D1_4   | 57 | PDYPPFKP  | KIAFTTKIY  | HN | NINS  | . | NGSIC | LDILRS  | .....         | QWSPALTVSKV | L          | LSI | CSLLC | D   | P   |
| Hs_Ubc2D3_4   | 57 | PDYPPFKP  | KVAFTRRIY  | HN | NINS  | . | NGSIC | LDILRS  | .....         | QWSPALTVSKV | L          | LSI | CSLLC | D   | P   |
| Hs_Ubc2D4_4   | 57 | PDYPPFKP  | KVAFTRRIY  | HN | NINS  | . | NGSIC | LDILRS  | .....         | QWSPALTVSKV | L          | LSI | CSLLC | D   | P   |
| Hs_UBE2E2_4   | 58 | SPDYPPFKP | KVTFTRRIY  | HN | NINS  | . | QGVIC | LDILKD  | .....         | NWSPALTVSKV | L          | LSI | CSLLT | D   | C   |
| Hs_UBE2E3_4   | 58 | SSDYPPFKP | KVTFTRRIY  | HN | NINS  | . | QGVIC | LDILKD  | .....         | NWSPALTVSKV | L          | LSI | CSLLT | D   | C   |
| Mm_Ubc2D1_4   | 57 | PDYPPFKP  | KIAFTTKIY  | HN | NINS  | . | NGSIC | LDILRS  | .....         | QWSPALTVSKV | L          | LSI | CSLLC | D   | P   |
| Mm_Ubc2D2_4   | 57 | PDYPPFKP  | KVAFTRRIY  | HN | NINS  | . | NGSIC | LDILRS  | .....         | QWSPALTVSKV | L          | LSI | CSLLC | D   | P   |
| Mm_Ubc2D3_4   | 57 | PDYPPFKP  | KVAFTRRIY  | HN | NINS  | . | NGSIC | LDILRS  | .....         | QWSPALTVSKV | L          | LSI | CSLLC | D   | P   |
| Mm_Ubc2E1_4   | 58 | TPDYPPFKP | KVTFTRRIY  | HN | NINS  | . | QGVIC | LDILKD  | .....         | NWSPALTVSKV | L          | LSI | CSLLT | D   | C   |
| Mm_Ubc2E2_4   | 58 | SPDYPPFKP | KVTFTRRIY  | HN | NINS  | . | QGVIC | LDILKD  | .....         | NWSPALTVSKV | L          | LSI | CSLLT | D   | C   |
| Mm_Ubc2E3_4   | 58 | SSDYPPFKP | KVTFTRRIY  | HN | NINS  | . | QGVIC | LDILKD  | .....         | NWSPALTVSKV | L          | LSI | CSLLT | D   | C   |
| Dm_Ubc2_4     | 57 | PDYPPFKP  | KVAFTRRIY  | HN | NINS  | . | NGSIC | LDILRS  | .....         | QWSPALTVSKV | L          | LSI | CSLLC | D   | P   |
| Dm_UbcD2_4    | 58 | SPDYPPFKP | KVTFTRRIY  | HN | NINS  | . | QGVIC | LDILKD  | .....         | NWSPALTVSKV | L          | LSI | CSLLT | D   | C   |
| Sc_Ubc5_4     | 58 | PDYPPFKP  | KVNFTRRIY  | HN | NINS  | . | SGNIC | LDILKD  | .....         | QWSPALTVSKV | L          | LSI | CSLLT | D   | C   |
| Sp_Ubc4_4     | 57 | PDYPPFKP  | KVNFTRRIY  | HN | NINS  | . | NGSIC | LDILRD  | .....         | QWSPALTVSKV | L          | LSI | CSLLT | D   | P   |
| At_Ubc14_4    | 63 | PLDYPPQP  | PIEFTRRIY  | HN | NDS   | . | EGNV  | CLAILK  | Q             | VFKPSIKLRSV | L          | QL  | LQLL  | R   | E   |
| At_Ubc30_4    | 57 | PDYPPFKP  | KVAFTRRIY  | HN | NINS  | . | NGSIC | LDILKE  | .....         | QWSPALTVSKV | L          | LSI | CSLLT | D   | P   |
| At_Ubc8_4     | 57 | PDYPPFKP  | KVAFTRRIY  | HN | NINS  | . | NGSIC | LDILKE  | .....         | QWSPALTVSKV | L          | LSI | CSLLT | D   | P   |
| At_Ubc9_4     | 57 | PDYPPFKP  | KVAFTRRIY  | HN | NINS  | . | NGSIC | LDILKE  | .....         | QWSPALTVSKV | L          | LSI | CSLLT | D   | P   |
| At_Ubc10_4    | 57 | PDYPPFKP  | KVAFTRRIY  | HN | NINS  | . | NGSIC | LDILKE  | .....         | QWSPALTVSKV | L          | LSI | CSLLT | D   | P   |
| At_Ubc11_4    | 57 | PDYPPFKP  | KVAFTRRIY  | HN | NINS  | . | NGSIC | LDILKE  | .....         | QWSPALTVSKV | L          | LSI | CSLLT | D   | P   |
| At_Ubc12_4    | 58 | SSDYPPFKP | KVNFTRRIY  | HN | NDS   | . | KGSIC | LDILKE  | .....         | QWSPALTVSKV | L          | LSI | CSLLT | D   | P   |
| At_Ubc28_4    | 57 | PDYPPFKP  | KVAFTRRIY  | HN | NINS  | . | NGSIC | LDILKE  | .....         | QWSPALTVSKV | L          | LSI | CSLLT | D   | P   |
| At_Ubc29_4    | 57 | PDYPPFKP  | KVAFTRRIY  | HN | NINS  | . | NGSIC | LDILKE  | .....         | QWSPALTVSKV | L          | LSI | CSLLT | D   | P   |
| Le_Ubc4_4     | 57 | PDYPPFKP  | KVAFTRRIY  | HN | NINS  | . | NGSIC | LDILKE  | .....         | QWSPALTVSKV | L          | LSI | CSLLT | D   | P   |
| Os_Ubc4_4     | 57 | PDYPPFKP  | KVAFTRRIY  | HN | NINS  | . | NGSIC | LDILKE  | .....         | QWSPALTVSKV | L          | LSI | CSLLT | D   | P   |
| Dd_UbcB_4     | 58 | PADYPPFKP | TLKFTTKIY  | HN | NIKT  | S | DGAI  | CAEVFS  | .....         | TWSPQLKLDV  | L          | TT  | RSII  | T   | D   |
| Cg_Ubc1_4     | 57 | PDYPPFKP  | KVNFTRRIY  | HN | NINS  | . | NGSIC | LDILRD  | .....         | QWSPALTVSKV | L          | LSI | CSMLT | D   | P   |
| Mg_Ubc1_4     | 57 | PDYPPFKP  | KVNFTRRIY  | HN | NINS  | . | NGSIC | LDILRD  | .....         | QWSPALTVSKV | L          | LSI | CSMLT | D   | P   |
| Rn_Ubc2d2_4   | 57 | PDYPPFKP  | KVAFTRRIY  | HN | NINS  | . | NGSIC | LDILRS  | .....         | QWSPALTVSKV | L          | LSI | CSLLC | D   | P   |
| Rn_Ubc2d2b_4  | 57 | TEYPPFKP  | KVEFTTRRIY | HN | NVNS  | . | NGSIC | LDILRS  | .....         | QWSPALTVSKV | L          | LSI | SSLLC | D   | P   |
| Rn_Ubc2d3_4   | 57 | PDYPPFKP  | KVAFTRRIY  | HN | NINS  | . | NGSIC | LDILRS  | .....         | QWSPALTVSKV | L          | LSI | CSLLC | D   | P   |
| Bt_Ubc2d3_4   | 57 | PDYPPFKP  | KVAFTRRIY  | HN | NINS  | . | NDSIC | LDILRS  | .....         | QWSPALTVSKV | L          | LSI | CSLLC | D   | P   |
| Fr_Ubc4_4     | 57 | PDYPPFKP  | KVAFTRRIY  | HN | NINS  | . | NGSIC | LDILKE  | .....         | QWSPALTVSKV | L          | LSI | CSLLT | D   | P   |
| Zm_Ubc4_4     | 57 | PDYPPFKP  | KVAFTRRIY  | HN | NINS  | . | NGSIC | LDILKE  | .....         | QWSPALTVSKV | L          | LSI | CSLLT | D   | P   |
| Le_Ubc4_4     | 57 | PDYPPFKP  | KVAFTRRIY  | HN | NINS  | . | NGSIC | LDILKE  | .....         | QWSPALTVSKV | L          | LSI | CSLLT | D   | P   |
| Os_Ubc5a_4    | 57 | PDYPPFKP  | KVAFTRRIY  | HN | NINS  | . | NGSIC | LDILKD  | .....         | QWSPALTVSKV | L          | LSI | CSLLT | D   | P   |
| Ca_Ubc4_4     | 57 | PDYPLKPP  | KIALTTKIY  | HN | NINS  | . | NGNIC | LDILKD  | .....         | QWSPALTVSKV | L          | LSI | CSLLT | D   | P   |
| Ps_Ubc4_4     | 57 | PDYPPFKP  | KVAFTRRIY  | HN | NINS  | . | NGSIC | LDILKE  | .....         | QWSPALTVSKV | L          | LSI | CSLLT | D   | P   |
| Hs_UBE2U_4    | 60 | TSEYNYAP  | PVVKFTIIF  | HN | VDR   | H | TGQP  | CDFLDNP | .....         | E           | KWNTNYTLSS | L   | AL    | QVM | SNP |
| Hs_UBE2E1_4   | 58 | TPDYPPFKP | KVTFTRRIY  | HN | NINS  | . | QGVIC | LDILKD  | .....         | NWSPALTVSKV | L          | LSI | CSLLT | D   | C   |
| Sc_Ubc4_4     | 58 | PDYPPFKP  | KISFTTKIY  | HN | NINA  | . | NGNIC | LDILKD  | .....         | QWSPALTVSKV | L          | LSI | CSLLT | D   | A   |
| Ce_Ubc2_4     | 57 | PDYPPFKP  | KVAFTRRIY  | HN | NINS  | . | NGSIC | LDILRS  | .....         | QWSPALTVSKV | L          | LSI | CSLLC | D   | P   |
| Xl_Ubc4_4     | 57 | PDYPPFKP  | KVAFTRRIY  | HN | NINS  | . | NGSIC | LDILRS  | .....         | QWSPALTVSKV | L          | LSI | CSLLC | D   | P   |
| Hs_Ubc2D2_4   | 57 | PDYPPFKP  | KVAFTRRIY  | HN | NINS  | . | NGSIC | LDILRS  | .....         | QWSPALTVSKV | L          | LSI | CSLLC | D   | P   |
| Mm_MGC58426_4 | 57 | PNNYPPFKP | KVFTTRRIY  | HN | ISK   | . | NGSIC | LDILNS  | .....         | MWSPALTVSKV | L          | LSI | CSLLC | D   | P   |
| Dm_CG5440_4   | 61 | PVEYPPFAP | PVVFTRPIY  | HN | IHR   | . | LGFI  | CLDILKE | .....         | KWSPALTVSKV | L          | LSI | CSLLT | D   | C   |
| Dm_CG10862_4  | 58 | PRNYPPFP  | PYLAFLTKIY | HN | IAL   | . | SGRI  | CLDILGS | .....         | KWSPALTVSKV | L          | LSI | MSLLA | D   | P   |
| Dm_CG2574_4   | 58 | PASYPFRAP | PIRFTRRIY  | HN | VDS   | . | RGAI  | CLDVLG  | .....         | RWSPALTVSKV | L          | LSI | YVLM  | S   | E   |

|               |     |     | α3  |      |     |      | α4  |     |      |      |       |          |
|---------------|-----|-----|-----|------|-----|------|-----|-----|------|------|-------|----------|
|               |     |     | Q   | Q    | Q   | Q    | Q   | Q   | Q    | Q    | Q     |          |
| Sc_Ubc3_3     |     |     |     |      |     |      |     |     |      |      |       |          |
| Sc_Ubc3_3     | 136 | NIN | PAN | VDA  | VDY | RKN  | PE  | QY  | KQR  | VKME | VER   | SKQD     |
| Hs_Ubc2D1_4   | 114 | NPD | PLV | PIA  | QIY | KSD  | KRY | NR  | HARE | WTQ  | KYAM  | .        |
| Hs_Ubc2D3_4   | 114 | NPD | PLV | PIA  | RIY | KDR  | KY  | NR  | ISRE | WTQ  | KYAM  | .        |
| Hs_Ubc2D4_4   | 114 | NPD | PLV | PIA  | HTY | KADR | KY  | NR  | ISRE | WTQ  | KYAM  | .        |
| Hs_Ubc2E2_4   | 115 | NPA | PLV | SIAT | QY  | MTNR | AE  | HDR | MARQ | WTK  | KRYAT | .        |
| Hs_Ubc2E3_4   | 115 | NPA | PLV | SIAT | QY  | LTNR | AE  | HDR | MARQ | WTK  | KRYAT | .        |
| Mm_Ubc2D1_4   | 114 | NPD | PLV | PIA  | QIY | KSD  | KRY | NR  | HARE | WTQ  | KYAM  | .        |
| Mm_Ubc2D2_4   | 114 | NPD | PLV | PIA  | RIY | KDR  | KY  | NR  | ISRE | WTQ  | KYAM  | .        |
| Mm_Ubc2D3_4   | 114 | NPD | PLV | PIA  | RIY | KDR  | KY  | NR  | ISRE | WTQ  | KYAM  | .        |
| Mm_Ubc2E1_4   | 115 | NPA | PLV | SIAT | QY  | MTNR | AE  | HDR | MARQ | WTK  | KRYAT | .        |
| Mm_Ubc2E2_4   | 115 | NPA | PLV | SIAT | QY  | MTNR | AE  | HDR | MARQ | WTK  | KRYAT | .        |
| Mm_Ubc2E3_4   | 115 | NPA | PLV | SIAT | QY  | LTNR | AE  | HDR | MARQ | WTK  | KRYAT | .        |
| Dm_Ubc2_4     | 114 | NPD | PLV | PIA  | RIY | KDR  | KY  | NR  | ISRE | WTQ  | KYAM  | .        |
| Dm_Ubc2_4     | 115 | NPA | PLV | SIAT | QY  | LQNR | AE  | HDR | MARQ | WTK  | KRYAT | .        |
| Sc_Ubc5_4     | 115 | NPD | PLV | PIA  | QIY | KDR  | KRY | EA  | TAKE | WTQ  | KYAV  | .        |
| Sp_Ubc4_4     | 114 | NPD | PLV | PIA  | HVY | KDR  | KRY | EA  | TAKE | WTQ  | KYAV  | .        |
| Sp_Ubc14_4    | 121 | NPD | PLV | PIA  | AEQ | YRNR | PS  | FD  | KIAR | DYV  | EQF   | AKS      |
| At_Ubc30_4    | 114 | NPD | PLV | PIA  | HIY | KDR  | KRY | EA  | TAKE | WTQ  | KYAV  | .        |
| At_Ubc8_4     | 114 | NPD | PLV | PIA  | HIY | KDR  | KRY | EA  | TAKE | WTQ  | KYAV  | .        |
| At_Ubc9_4     | 114 | NPD | PLV | PIA  | HIY | KDR  | KRY | EA  | TAKE | WTQ  | KYAV  | .        |
| At_Ubc10_4    | 114 | NPD | PLV | PIA  | HIY | KDR  | KRY | EA  | TAKE | WTQ  | KYAV  | .        |
| At_Ubc11_4    | 114 | NPD | PLV | PIA  | HIY | KDR  | KRY | EA  | TAKE | WTQ  | KYAV  | .        |
| At_Ubc12_4    | 115 | NPN | PLV | PIA  | HLI | YKDR | KRY | EA  | TAKE | WTQ  | KYAV  | .        |
| At_Ubc28_4    | 114 | NPD | PLV | PIA  | HIY | KDR  | KRY | EA  | TAKE | WTQ  | KYAV  | .        |
| At_Ubc29_4    | 114 | NPD | PLV | PIA  | HIY | KDR  | KRY | EA  | TAKE | WTQ  | KYAV  | .        |
| Le_Ubc4_4     | 114 | NPD | PLV | PIA  | HIY | KDR  | KRY | EA  | TAKE | WTQ  | KYAV  | .        |
| Os_Ubc_4      | 114 | NPD | PLV | PIA  | HIY | KDR  | KRY | EA  | TAKE | WTQ  | KYAV  | .        |
| Dd_UbcB_4     | 115 | NPD | PLV | PIA  | QCF | KDR  | KRY | EA  | TAKE | WTQ  | KYAV  | .        |
| Cg_Ubc1_4     | 114 | NPD | PLV | PIA  | HVY | KDR  | KRY | EA  | TAKE | WTQ  | KYAV  | .        |
| Mg_Ubc1_4     | 114 | NPD | PLV | PIA  | HVY | KDR  | KRY | EA  | TAKE | WTQ  | KYAV  | .        |
| Rn_Ubc2d2_4   | 114 | NPD | PLV | PIA  | RIY | KDR  | KRY | NR  | ISRE | WTQ  | KYAM  | .        |
| Rn_Ubc2d2b_4  | 114 | NPD | PLV | PIA  | QIY | KDR  | KRY | NR  | ISRE | WTQ  | KYAM  | .        |
| Rn_Ubc2d3_4   | 114 | NPD | PLV | PIA  | RIY | KDR  | KRY | NR  | ISRE | WTQ  | KYAM  | .        |
| Bt_Ubc2d3_4   | 114 | NPD | PLV | PIA  | RIY | KDR  | KRY | NR  | ISRE | WTQ  | KYAM  | .        |
| Fr_Ubc_4      | 114 | NPD | PLV | PIA  | HIY | KDR  | KRY | EA  | TAKE | WTQ  | KYAV  | .        |
| Zm_Ubc_4      | 114 | NPD | PLV | PIA  | HIY | KDR  | KRY | EA  | TAKE | WTQ  | KYAV  | .        |
| Le_Ubc_4      | 114 | NPD | PLV | PIA  | HIY | KDR  | KRY | EA  | TAKE | WTQ  | KYAV  | .        |
| Os_Ubc5a_4    | 114 | NPD | PLV | PIA  | HIY | KDR  | KRY | EA  | TAKE | WTQ  | KYAV  | .        |
| Ca_Ubc4_4     | 114 | NPD | PLV | PIA  | HIY | KDR  | KRY | EA  | TAKE | WTQ  | KYAV  | .        |
| Ps_Ubc4_4     | 114 | NPD | PLV | PIA  | HIY | KDR  | KRY | EA  | TAKE | WTQ  | KYAV  | .        |
| Hs_Ubc2U_4    | 120 | VLE | NPN | LEA  | RI  | LVD  | ES  | LY  | RI   | LRL  | FN    | RLQM     |
| Hs_Ubc2E1_4   | 115 | NPA | PLV | SIAT | QY  | MTNR | AE  | HDR | MARQ | WTK  | KRYAT | .        |
| Sc_Ubc4_4     | 115 | NPD | PLV | PIA  | RIY | KDR  | KRY | EA  | TAKE | WTQ  | KYAV  | .        |
| Ce_Ubc2_4     | 114 | NPD | PLV | PIA  | RIY | KDR  | KRY | NR  | ISRE | WTQ  | KYAM  | .        |
| Xl_Ubc4_4     | 114 | NPD | PLV | PIA  | RIY | KDR  | KRY | NR  | ISRE | WTQ  | KYAM  | .        |
| Mm_Ubc2D2_4   | 114 | NPD | PLV | PIA  | RIY | KDR  | KRY | NR  | ISRE | WTQ  | KYAM  | .        |
| Mm_MGC58426_4 | 114 | NPD | PLV | PIA  | KVY | RKDL | RE  | Y   | NR   | ISRE | WTQ   | KYAM     |
| Dm_CG5440_4   | 118 | NPK | PLM | AKI  | GTE | Y    | LK  | NR  | AE   | HDR  | KAR   | LWTKR... |
| Dm_CG10862_4  | 115 | NPH | PLM | EV   | SAD | V    | F   | K   | NR   | AE   | HDR   | KAR      |
| Dm_CG2574_4   | 115 | NPD | PLV | PIA  | QIY | KDR  | KRY | EA  | TAKE | WTQ  | KYAV  | .        |







$\alpha 1$   $\beta 1$   $\beta 2$   $\beta 3$   
*Sc\_Ubc3\_3* 1 MS.S.RKSTASSL.LLRQY.RELTDPKAIPESHIELEDDSD...NIFWNICVMVLNEDSIYHGGFFKAQM  
*Sc\_Ubc3\_7* 1 MSS...LCLQR.LQEERKWRKRDHP...FGEYAKPVKKADGSMDLQWEACIPGK.EGTNWAGGVYPTIV  
*Mm\_Ube2I\_7* 1 MSG...LALSR.LAQERKWRKRDHP...FGEVAVPTKNPFGTMNLMNWECAIPGK.KGTPWEGGFYKLRM  
*Hs\_Ube2I\_7* 1 MSG...LALSR.LAQERKWRKRDHP...FGEVAVPTKNPFGTMNLMNWECAIPGK.KGTPWEGGFYKLRM  
*Sp\_Ubc9\_7* 1 MSG...LCKTR.LQEERKWRKRDHP...FGEYAKPCSSDGGLDLWVKVGTIPGK.PKTSWEGGFYKLRM  
*At\_AHUS5\_7* 1 MSG...LARGR.LAEERKWRKRDHP...HGEYAKPEFGDGTVNLWVCTIPGK.AGTDWEGGFYKLRM  
*Dm\_UbcD9\_7* 1 MSG...LITR.LAEERKWRKRDHP...FGEVAVPTKNPFGTMNLMNWECAIPGK.KGTPWEGGFYKLRM  
*Ce\_Ubc9\_7* 1 MSG...LAGR.LAEERKWRKRDHP...FGEYAKPVKNADGTLNLFWECAIPGK.KDTPWEGGFYKLRM  
*Xl\_Ubc9\_7* 1 MSG...LALSR.LAQERKWRKRDHP...FGEVAVPTKNPFGTMNLMNWECAIPGK.KGTPWEGGFYKLRM  
*Gg\_Ubc9\_7* 1 MSG...LALSR.LAQERKWRKRDHP...FGEVAVPTKNPFGTMNLMNWECAIPGK.KGTPWEGGFYKLRM  
*Rn\_Ubc9\_7* 1 MSG...LALSR.LAQERKWRKRDHP...FGEVAVPTKNPFGTMNLMNWECAIPGK.KGTPWEGGFYKLRM  
*Br\_Ubc9a\_7* 1 MSG...LALSR.LAQERKWRKRDHP...FGEVAVPTKNPFGTMNLMNWECAIPGK.KGTPWEGGFYKLRM  
*Ma\_Ube2I\_7* 1 MSG...LALSR.LAQERKWRKRDHP...FGEVAVPTKNPFGTMNLMNWECAIPGK.KGTPWEGGFYKLRM

$\beta 4$   $\alpha 2$   
*Sc\_Ubc3\_3* 65 RFPEDFPSPPKCFEPPAIPVHPNVYRGRVCHSLHQS...GDPMTDEPDAETWSPVQIVESVLLISIVSLLLED  
*Sc\_Ubc3\_7* 63 EYFNEYPSKPKVFPAGFHPNVYRGTVCISLNEED...KDWRPATITKQIIVLGVQDILLNS  
*Mm\_Ube2I\_7* 63 LEKDDYPSPPKCFEPPLEHPNVYRGTVCISLLED...KDWRPATITKQIILLGIQDILLNE  
*Hs\_Ube2I\_7* 63 LEKDDYPSPPKCFEPPLEHPNVYRGTVCISLLED...KDWRPATITKQIILLGIQDILLNE  
*Sp\_Ubc9\_7* 63 AEPEDYPSPPKCFEPTLHPNVYRGTVCISLNEED...KDWRPATITKQIILLGIQDILLNE  
*At\_AHUS5\_7* 64 HFSDDYPSKPKCFEPPQGFHPNVYRGTVCISLNEED...YGRWPATITKQIIVLGVQDILLDT  
*Dm\_UbcD9\_7* 63 LEKDDYPSPPKCFEPPLEHPNVYRGTVCISLLED...KDWRPATITKQIILLGIQDILLNE  
*Ce\_Ubc9\_7* 63 LEKDDYPSPPKCFEPPLEHPNVYRGTVCISLLED...KDWRPATITKQIILLGIQDILLNE  
*Xl\_Ubc9\_7* 63 LEKDDYPSPPKCFEPPLEHPNVYRGTVCISLLED...KDWRPATITKQIILLGIQDILLNE  
*Gg\_Ubc9\_7* 63 LEKDDYPSPPKCFEPPLEHPNVYRGTVCISLLED...KDWRPATITKQIILLGIQDILLNE  
*Rn\_Ubc9\_7* 63 LEKDDYPSPPKCFEPPLEHPNVYRGTVCISLLED...KDWRPATITKQIILLGIQDILLNE  
*Br\_Ubc9a\_7* 63 LEKDDYPSPPKCFEPPLEHPNVYRGTVCISLLED...KDWRPATITKQIILLGIQDILLNE  
*Ma\_Ube2I\_7* 63 LEKDDYPSPPKCFEPPLEHPNVYRGTVCISLLED...KDWRPATITKQIILLGIQDILLNE

$\alpha 3$   $\alpha 4$   
*Sc\_Ubc3\_3* 135 PNIISPAVYDPAVDYRKNPEQYKQRVKMEVERSKQDD.  
*Sc\_Ubc3\_7* 123 PNPNSPAEPAWRFSRKNKABYDKKVLQAKQYSK..  
*Mm\_Ube2I\_7* 123 PNIQDPAAAEAYTIYQNRVVEYKRVRAQAKKFAPS.  
*Hs\_Ube2I\_7* 123 PNIQDPAAAEAYTIYQNRVVEYKRVRAQAKKFAPS.  
*Sp\_Ubc9\_7* 123 PNIASPAQTEAYTMFKKDKVEYKRVRAQARENAP..  
*At\_AHUS5\_7* 124 PNPADPAQTDGQHLFQCDPVEYKRVKLSQKQYPALV  
*Dm\_UbcD9\_7* 123 PNIKDPAAAEAYTIYQNRRLVEYKRVRAQARMAATE  
*Ce\_Ubc9\_7* 123 PNIQDPAAAEAYTIYQNRRAVEYKRVRAQAKVFYAAEL  
*Xl\_Ubc9\_7* 123 PNIQDPAAAEAYTIYQNRVVEYKRVRAQAKKFAPS.  
*Gg\_Ubc9\_7* 123 PNIQDPAAAEAYTIYQNRVVEYKRVRAQAKKFAPS.  
*Rn\_Ubc9\_7* 123 PNIQDPAAAEAYTIYQNRVVEYKRVRAQAKKFAPS.  
*Br\_Ubc9a\_7* 123 PNIQDPAAAEAYTIYQNRVVEYKRVRAQAKKFAPS.  
*Ma\_Ube2I\_7* 123 PNIQDPAAAEAYTIYQNRVVEYKRVRAQAKKFAPS.



$\alpha 1$   $\beta 1$   $\beta 2$   $\beta 3$   
*Sc\_Ubc3\_3* 1 MSS.RKSTAS<sup>8</sup> LRLQYRELIDPKKAIKPSFHIELE.DDS...NIFITWNI<sup>1</sup>GVMLNEDSRYHG<sup>1</sup>GFFRAQ<sup>1</sup>  
*Sc\_Ubc3\_3* 1 ...RVSVRDKL<sup>1</sup>LVKEVAELEANLPCT...CKVHF...PDP...NKLHC.FQLTIVT<sup>1</sup>PDEGY<sup>1</sup>YGGKRFQFE<sup>1</sup>  
*Hs\_Ubc2F\_8* 1 ...RIAVRDKL<sup>1</sup>LAQELQLEALALRDQK...QKLWHL.EVPSL...SCLHE.FELTIVT<sup>1</sup>PQEGY<sup>1</sup>YRGGKRFQFE<sup>1</sup>  
*Ce\_Ubc12\_8* 1 ...KASAAQLR<sup>1</sup>IQKDI<sup>1</sup>NELNIPKTC...ISFSD...PD...DLN.FKLVIC<sup>1</sup>PDEGY<sup>1</sup>YKSGKRFVFS<sup>1</sup>  
*Hs\_Ubc2M\_8* 1 ...ISPAQIR<sup>1</sup>IQKDV<sup>1</sup>LELIPSTMS...TSWPD...PI...KLN.VLHLEIR<sup>1</sup>PDEGY<sup>1</sup>YKSGKRFVFS<sup>1</sup>  
*Sp\_Ubc12\_8* 1 ...KQSAGELR<sup>1</sup>LHKDISELNIPKSC...ISFPNG.KN...DLMN.FEVTIK<sup>1</sup>PDEGY<sup>1</sup>YKSGKRFVFS<sup>1</sup>  
*At\_RCE1\_8* 1 ...KVTAAQLR<sup>1</sup>VQKDLSELNIGSTMK...TEFPD...PD...DLN.FELVIE<sup>1</sup>PDEGN<sup>1</sup>YKSGKRFVFS<sup>1</sup>  
*Nc\_Ubc\_8* 1 ...NLSAARIR<sup>1</sup>LKRDLDLDPPTVTLL...NVIT...SPDSADRSQSPK.LEVIVR<sup>1</sup>PDEGY<sup>1</sup>YKSGKRFVFS<sup>1</sup>  
*Sc\_Ubc12\_8* 1 ...KASAAQLR<sup>1</sup>IQKDI<sup>1</sup>NELNIPKTC...ISFSD...PD...DLN.FKLVIC<sup>1</sup>PDEGY<sup>1</sup>YKSGKRFVFS<sup>1</sup>  
*Mm\_Ubc2M\_8* 1 ...RVSVRDKL<sup>1</sup>LVKEVAELEANLPCT...CKVHF...PDP...NKLHC.FQLTIVS<sup>1</sup>PDEGY<sup>1</sup>YGGKRFQFE<sup>1</sup>  
*Mm\_Ubc2F\_8* 1 ...KASAAQLR<sup>1</sup>IQKDI<sup>1</sup>NELNIPKTC...ISFSD...PD...DLN.FKLVIC<sup>1</sup>PDEGY<sup>1</sup>YKSGKRFVFS<sup>1</sup>  
*Dm\_CG7375\_8* 1 ...RVSVRDKL<sup>1</sup>LVKEVAELEANLPCT...CKVHF...PDP...NKLHC.FQLTIVS<sup>1</sup>PDEGY<sup>1</sup>YGGKRFQFE<sup>1</sup>  
*At\_RCE1\_8* 1 ...KQSAGELR<sup>1</sup>LHKDISELNIPKSC...ISFPNG.KD...DLMN.FEVSIIK<sup>1</sup>PDDGY<sup>1</sup>YHNGTFFVFT<sup>1</sup>  
*Rn\_Ubc2F\_8* 1 ...RVSVRDKL<sup>1</sup>LVKEVAELEANLPCT...CKVHF...PDP...NKLHC.FQLTIVS<sup>1</sup>PDEGY<sup>1</sup>YGGKRFQFE<sup>1</sup>  
*Gg\_Ubc2F\_8* 1 ...RVSIRDRR<sup>1</sup>LIVKEVAELEANLPST...CKVTF...PDE...NKLCH.FQLTIVS<sup>1</sup>PDEGY<sup>1</sup>YGGKRFQFE<sup>1</sup>  
*Br\_Ubc2M\_8* 1 ...RISVRDRR<sup>1</sup>LIVKEVAELEANLPCT...CKVNF...PDP...NKLHY.FHLTIVS<sup>1</sup>PDEGY<sup>1</sup>YGGKRFQFE<sup>1</sup>  
*Xl\_Ubc2F\_8* 1 ...KASAAQLR<sup>1</sup>IQKDI<sup>1</sup>NELNIPKTC...ISFSD...PD...DLN.FKLVIC<sup>1</sup>PDEGY<sup>1</sup>YKSGKRFVFS<sup>1</sup>  
*Bt\_Ubc12\_8* 1 ...GELR<sup>1</sup>LHKDISELNIPKTC...ISFPNG.KD...DLMN.FEVTIK<sup>1</sup>PDEGY<sup>1</sup>YKSGKRFVFS<sup>1</sup>  
*Le\_RCE1\_8* 1

$\beta 4$   $\alpha 2$   
*Sc\_Ubc3\_3* 64 MRFPEDPFSP<sup>1</sup>QFRFIPAIYHPN<sup>1</sup>Y.RDGRICISILHQ<sup>1</sup>SG.DPMTDEPDAETW<sup>1</sup>SPVCI<sup>1</sup>VESVLI<sup>1</sup>STVLS<sup>1</sup>L<sup>1</sup>  
*Sc\_Ubc3\_3* 57 TEVPDAYNMVPPKVKCLTKI<sup>1</sup>HPN<sup>1</sup>TE.TGEICLSLIRE<sup>1</sup>HSIDG...TGW<sup>1</sup>PIRT<sup>1</sup>LKDVVWGLNS<sup>1</sup>L<sup>1</sup>  
*Hs\_Ubc2F\_8* 61 IVPPEYNNVPPVKVCLTKV<sup>1</sup>HPN<sup>1</sup>INE.DGSI<sup>1</sup>CLSLRQNSLDQ...YGW<sup>1</sup>PIRT<sup>1</sup>LKDVVWGLNS<sup>1</sup>L<sup>1</sup>  
*Ce\_Ubc12\_8* 55 FKVGQGYPHDPPKVKCE<sup>1</sup>TMVYHPN<sup>1</sup>IDL.EGNV<sup>1</sup>CLNILRE...DWR<sup>1</sup>PVLT<sup>1</sup>INSIIYGLQYL<sup>1</sup>  
*Hs\_Ubc2M\_8* 54 IQIDDDNYPHDPKVKCLNKI<sup>1</sup>HPN<sup>1</sup>DI.EGNV<sup>1</sup>CLNILRQ...DWR<sup>1</sup>PVLT<sup>1</sup>INSIIYGLQYL<sup>1</sup>  
*Sp\_Ubc12\_8* 56 FQVSNMYPHEAPKVKCK<sup>1</sup>TKVYHPN<sup>1</sup>IDL.EGNV<sup>1</sup>CLNILRE...DWR<sup>1</sup>PVLT<sup>1</sup>INSIIYGLQYL<sup>1</sup>  
*At\_RCE2\_8* 55 FNITPNFPHEAPKVKCK<sup>1</sup>TKVYHPN<sup>1</sup>IDL.EGNV<sup>1</sup>CLNILRE...DWR<sup>1</sup>PVLT<sup>1</sup>INSIIYGLQYL<sup>1</sup>  
*Nc\_Ubc\_8* 61 LDFNEVYPIEPKVKCLK<sup>1</sup>KIHPN<sup>1</sup>IDL.KGNV<sup>1</sup>CLNILRE...DWR<sup>1</sup>PVLT<sup>1</sup>INSIIYGLQYL<sup>1</sup>  
*Sc\_Ubc12\_8* 55 FKVGQGYPHDPPKVKCE<sup>1</sup>TMVYHPN<sup>1</sup>IDL.EGNV<sup>1</sup>CLNILRE...DWR<sup>1</sup>PVLT<sup>1</sup>INSIIYGLQYL<sup>1</sup>  
*Mm\_Ubc2M\_8* 57 TEVPDAYNMVPPKVKCLTKI<sup>1</sup>HPN<sup>1</sup>TE.TGEICLSLIRE<sup>1</sup>HSIDG...TGW<sup>1</sup>PIRT<sup>1</sup>LKDVVWGLNS<sup>1</sup>L<sup>1</sup>  
*Mm\_Ubc2F\_8* 55 FVVGSSNYPHEAPKVKCA<sup>1</sup>TKVYHPN<sup>1</sup>IDL.EGNV<sup>1</sup>CLNILRE...DWR<sup>1</sup>PVLT<sup>1</sup>INSIIYGLQYL<sup>1</sup>  
*Dm\_CG7375\_8* 56 FQVSNMYPHEAPKVKCK<sup>1</sup>TKVYHPN<sup>1</sup>IDL.EGNV<sup>1</sup>CLNILRE...DWR<sup>1</sup>PVLT<sup>1</sup>INSIIYGLQYL<sup>1</sup>  
*At\_RCE1\_8* 57 TEVPDAYNMVPPKVKCLTKI<sup>1</sup>HPN<sup>1</sup>TE.TGEICLSLIRE<sup>1</sup>HSIDG...TGW<sup>1</sup>PIRT<sup>1</sup>LKDVVWGLNS<sup>1</sup>L<sup>1</sup>  
*Rn\_Ubc2F\_8* 57 IEVPDAYNMVPPKVKCLTR<sup>1</sup>IHPN<sup>1</sup>TE.TGEICLSLIRE<sup>1</sup>HSIDG...TGW<sup>1</sup>PIRT<sup>1</sup>LKDVVWGLNS<sup>1</sup>L<sup>1</sup>  
*Gg\_Ubc2F\_8* 57 IEVPDAYNMVPPKVKCLTR<sup>1</sup>IHPN<sup>1</sup>TE.TGEICLSLIRE<sup>1</sup>HSIDG...TGW<sup>1</sup>PIRT<sup>1</sup>LKDVVWGLNS<sup>1</sup>L<sup>1</sup>  
*Br\_Ubc2F\_8* 57 IEVPDAYNMVPPKVKCLTR<sup>1</sup>IHPN<sup>1</sup>TE.TGEICLSLIRE<sup>1</sup>HSIDG...TGW<sup>1</sup>PIRT<sup>1</sup>LKDVVWGLNS<sup>1</sup>L<sup>1</sup>  
*Xl\_Ubc2F\_8* 57 IEVPDAYNMVPPKVKCLTR<sup>1</sup>IHPN<sup>1</sup>TE.TGEICLSLIRE<sup>1</sup>HSIDG...TGW<sup>1</sup>PIRT<sup>1</sup>LKDVVWGLNS<sup>1</sup>L<sup>1</sup>  
*Sc\_Ubc12\_8* 55 FKVGQGYPHDPPKVKCE<sup>1</sup>TMVYHPN<sup>1</sup>IDL.EGNV<sup>1</sup>CLNILRE...DWR<sup>1</sup>PVLT<sup>1</sup>INSIIYGLQYL<sup>1</sup>  
*Bt\_Ubc12\_8* 55 FLSPIYPHEAPKVKCK<sup>1</sup>TKVYHPN<sup>1</sup>IDL.EGNV<sup>1</sup>CLNILRE...DWR<sup>1</sup>PVLT<sup>1</sup>INSIIYGLQYL<sup>1</sup>  
*Le\_RCE1\_8* 52

$\alpha 3$   $\alpha 4$   
*Sc\_Ubc3\_3* 132 LEPD<sup>1</sup>NI<sup>1</sup>INSPAN<sup>1</sup>VAAV<sup>1</sup>DYRKNPE<sup>1</sup>QYK<sup>1</sup>QV<sup>1</sup>KMEVERSKQD<sup>1</sup>  
*Sc\_Ubc3\_3* 119 FTDLLNFDDPNI<sup>1</sup>EAAE<sup>1</sup>HHLRDKED<sup>1</sup>FRNK<sup>1</sup>VDDYIKRYAR<sup>1</sup>  
*Hs\_Ubc2F\_8* 123 FMDLNFDDPNI<sup>1</sup>EAAE<sup>1</sup>HHLRDKED<sup>1</sup>FRNK<sup>1</sup>VDDYIKRYAR<sup>1</sup>  
*Hs\_Ubc2M\_8* 111 FLEP<sup>1</sup>NPEDPNI<sup>1</sup>EAAE<sup>1</sup>VLQNNR<sup>1</sup>LFEN<sup>1</sup>QVRSMRGGYIG<sup>1</sup>  
*Sp\_Ubc12\_8* 110 FLEP<sup>1</sup>NPEDPNI<sup>1</sup>EAAE<sup>1</sup>VLQNNR<sup>1</sup>LFEN<sup>1</sup>QVRSMRGGYIG<sup>1</sup>  
*At\_RCE2\_8* 112 FLEP<sup>1</sup>NPEDPNI<sup>1</sup>EAAE<sup>1</sup>VLQNNR<sup>1</sup>LFEN<sup>1</sup>QVRSMRGGYIG<sup>1</sup>  
*Nc\_Ubc\_8* 111 FLEP<sup>1</sup>NPEDPNI<sup>1</sup>EAAE<sup>1</sup>VLQNNR<sup>1</sup>LFEN<sup>1</sup>QVRSMRGGYIG<sup>1</sup>  
*Sc\_Ubc12\_8* 117 FLEP<sup>1</sup>NPEDPNI<sup>1</sup>EAAE<sup>1</sup>VLQNNR<sup>1</sup>LFEN<sup>1</sup>QVRSMRGGYIG<sup>1</sup>  
*Mm\_Ubc2M\_8* 111 FLEP<sup>1</sup>NPEDPNI<sup>1</sup>EAAE<sup>1</sup>VLQNNR<sup>1</sup>LFEN<sup>1</sup>QVRSMRGGYIG<sup>1</sup>  
*Mm\_Ubc2F\_8* 119 FTDLLNFDDPNI<sup>1</sup>EAAE<sup>1</sup>HHLRDKED<sup>1</sup>FRNK<sup>1</sup>VDDYIKRYAR<sup>1</sup>  
*Dm\_CG7375\_8* 111 FLEP<sup>1</sup>NPEDPNI<sup>1</sup>EAAE<sup>1</sup>VLQNNR<sup>1</sup>LFEN<sup>1</sup>QVRSMRGGYIG<sup>1</sup>  
*At\_RCE1\_8* 112 FLEP<sup>1</sup>NPEDPNI<sup>1</sup>EAAE<sup>1</sup>VLQNNR<sup>1</sup>LFEN<sup>1</sup>QVRSMRGGYIG<sup>1</sup>  
*Rn\_Ubc2F\_8* 119 FTDLLNFDDPNI<sup>1</sup>EAAE<sup>1</sup>HHLRDKED<sup>1</sup>FRNK<sup>1</sup>VDDYIKRYAR<sup>1</sup>  
*Gg\_Ubc2F\_8* 119 FTDLLNFDDPNI<sup>1</sup>EAAE<sup>1</sup>HHLRDKED<sup>1</sup>FRNK<sup>1</sup>VDDYIKRYAR<sup>1</sup>  
*Br\_Ubc2F\_8* 119 FTDLLNFDDPNI<sup>1</sup>EAAE<sup>1</sup>HHLRDKED<sup>1</sup>FRNK<sup>1</sup>VDDYIKRYAR<sup>1</sup>  
*Xl\_Ubc2F\_8* 119 FTDLLNFDDPNI<sup>1</sup>EAAE<sup>1</sup>HHLRDKED<sup>1</sup>FRNK<sup>1</sup>VDDYIKRYAR<sup>1</sup>  
*Sc\_Ubc12\_8* 111 FLEP<sup>1</sup>NPEDPNI<sup>1</sup>EAAE<sup>1</sup>VLQNNR<sup>1</sup>LFEN<sup>1</sup>QVRSMRGGYIG<sup>1</sup>  
*Bt\_Ubc12\_8* 111 FLEP<sup>1</sup>NPEDPNI<sup>1</sup>EAAE<sup>1</sup>VLQNNR<sup>1</sup>LFEN<sup>1</sup>QVRSMRGGYIG<sup>1</sup>  
*Le\_RCE1\_8* 108 FLEP<sup>1</sup>NPEDPNI<sup>1</sup>EAAE<sup>1</sup>VLQNNR<sup>1</sup>LFEN<sup>1</sup>QVRSMRGGYIG<sup>1</sup>















**Figure 2. Conformational landscape explored in Cdc34<sup>UBC</sup> simulations.** The free energy landscape is represented using projection of the Cdc34<sup>UBC</sup> macro-trajectory along the principal components PC1 and PC2 of the essential subspace. The free energy is given in KJ/mol and indicated by the color bar. The label A-E indicates the region corresponding to the minimum free energy basins and the most populated structural clusters from cluster analysis.

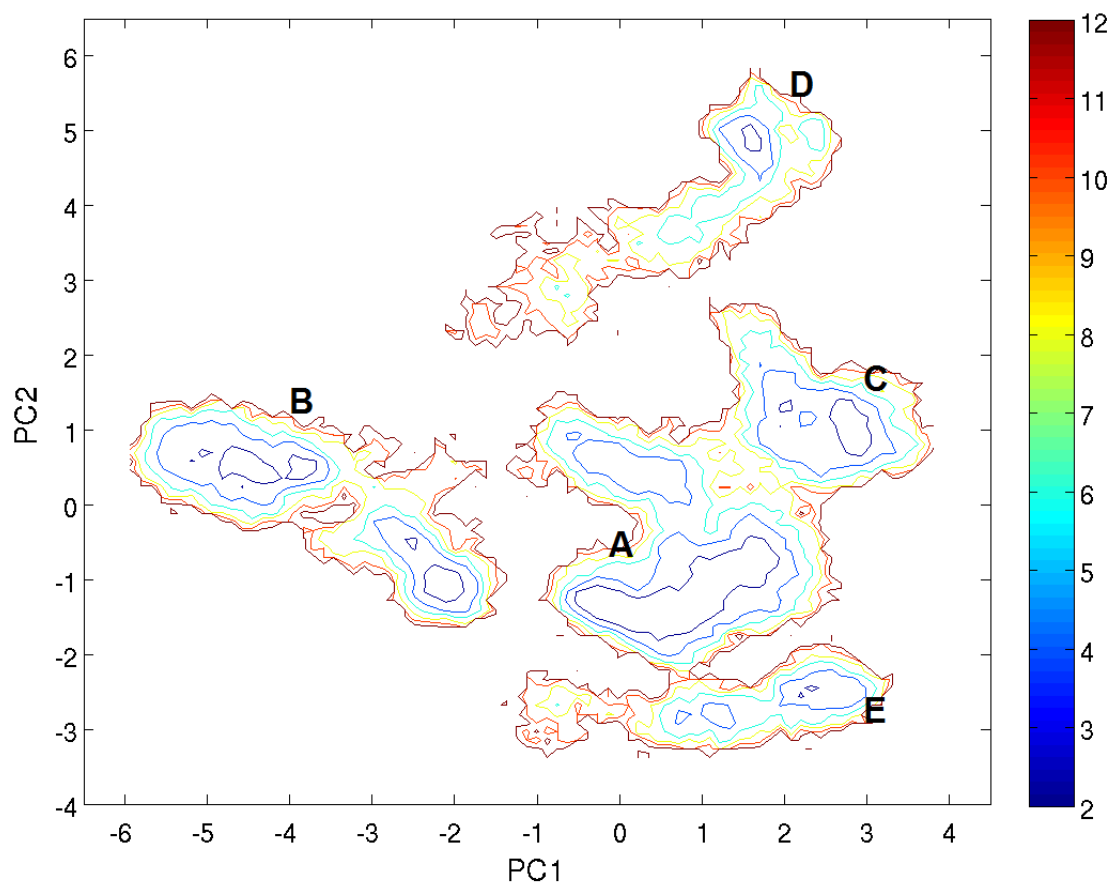

**Figure 3. Flexibility profiles of non-phosphorylated Cdc34<sup>UBC</sup>.**  $\alpha$  rmsf of ensemble trajectories of Cdc34<sup>UBC</sup> and Cdc34<sup>UBC</sup>-S130AS167A concatenated trajectories. The most persistent secondary structure during the simulations are represented schematically for each protein system. The rectangular box indicates the acidic loop.

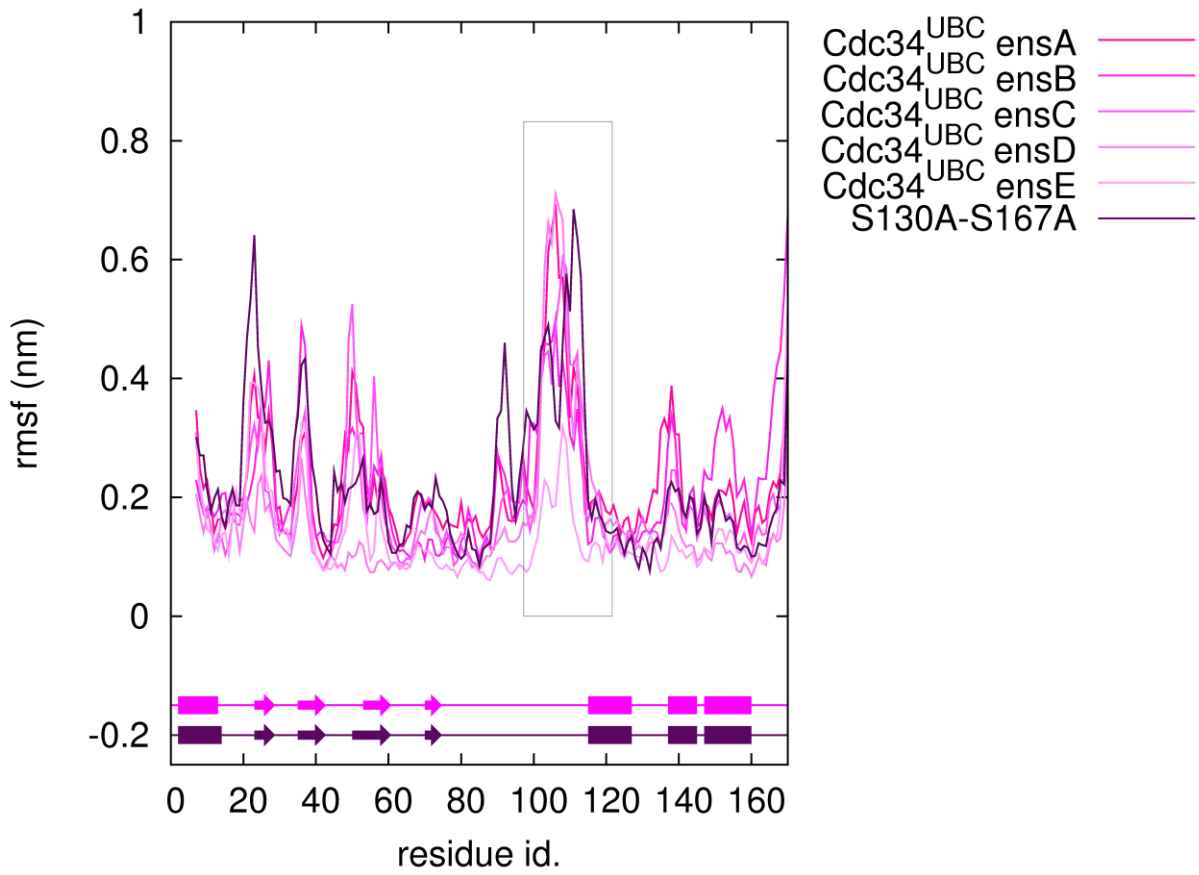

**Figure 4. Flexibility profiles of phospho-Cdc34<sup>UBC</sup>-pS130pS167 simulations.** C $\alpha$  rmsf of ensemble trajectories of Cdc34<sup>UBC</sup>-pS130-pS167 and non-phosphorylated Cdc34<sup>UBC</sup> are compared. The most persistent secondary structure during the simulations are represented schematically for each protein system. The rectangular box indicates the acidic loop.

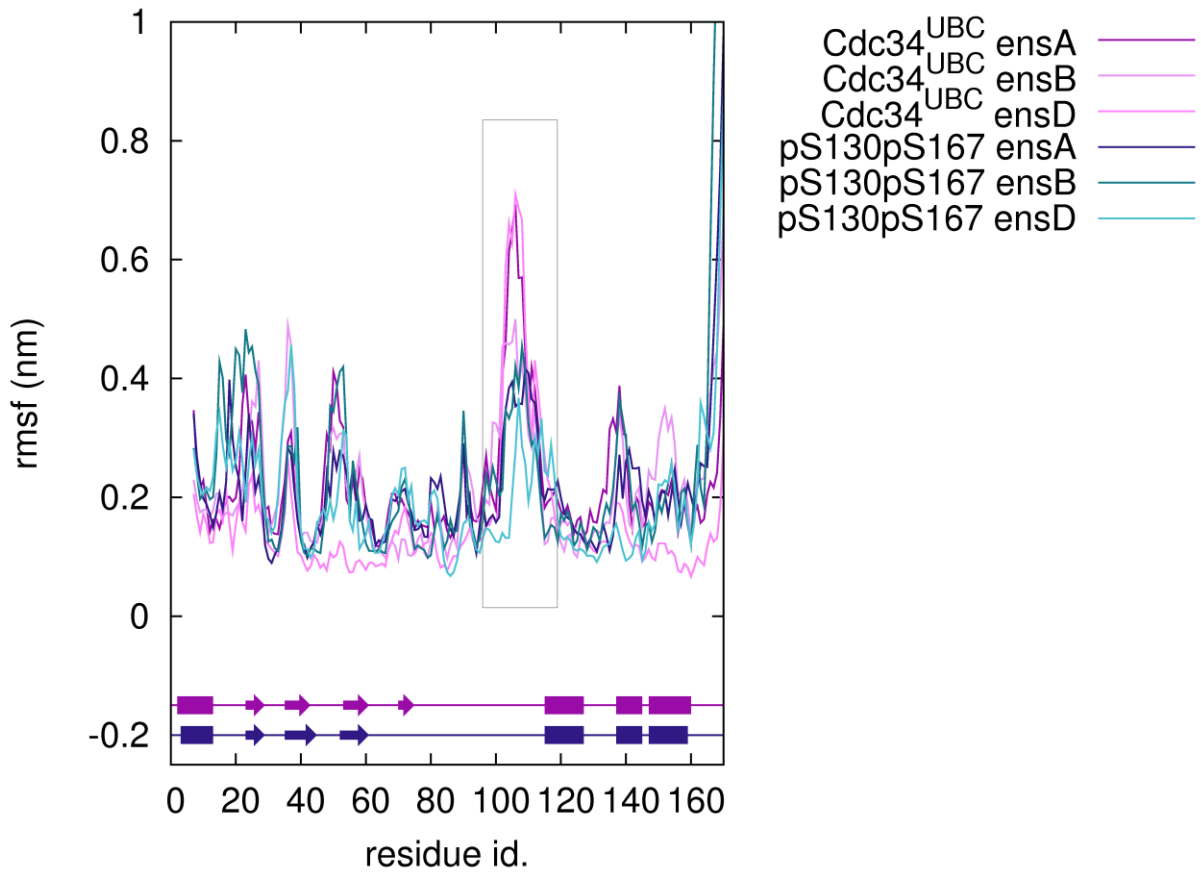

**Figure 5. 3D structural superimposition of an average structure from phospho-Cdc34<sup>UBC</sup> simulations, free NMR and X-ray structure of Ube2g2 and Ube2g2 in complex with the gp78 region of its E3 partner.** The average structure of phospho Cdc34<sup>UBC</sup> simulations is shown in blue, the NMR (PDB entry 2KLY) and X-ray (PDB entry 2CYX) structure of Ube2g2 are shown in dark and light green, respectively, the structure of Ube2g2 in complex with gp78 region of E3 partner (PDB entry 3H8K) is shown in orange. The catalytic cysteine is shown as yellow stick.

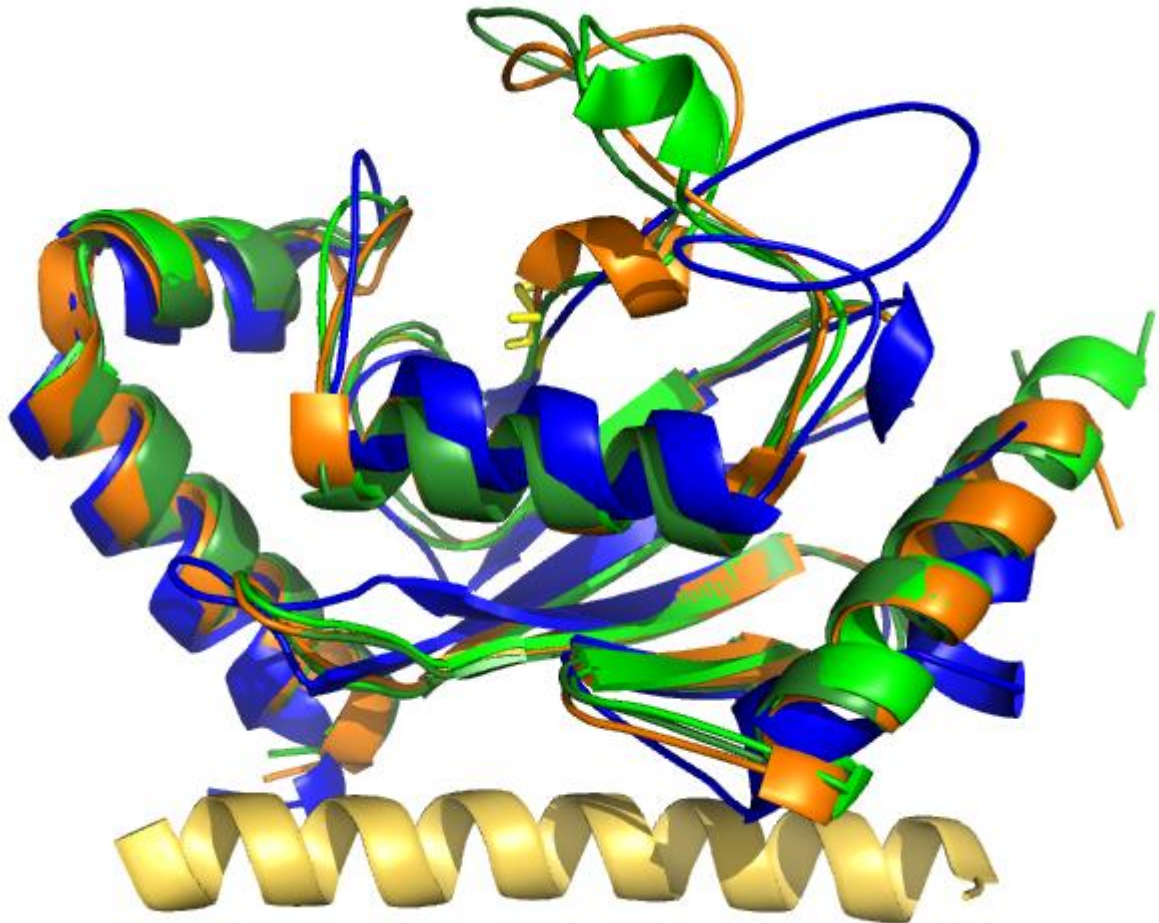

**Figure 6. Projection of the simulations frames along the PC1 of Cdc34<sup>UBC</sup>-S130D concatenated trajectory, indicated with different shades of grey. The rectangular box indicates the acidic loop and its aminoacidic composition.**

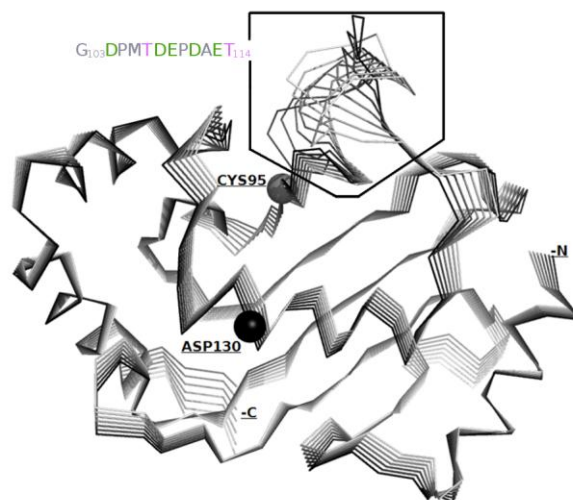



Figure 7. Root mean square fluctuation (rmsf) profiles of Cdc34<sup>UBC</sup> and Cdc34- $\Delta$ 12<sup>UBC</sup> domains.

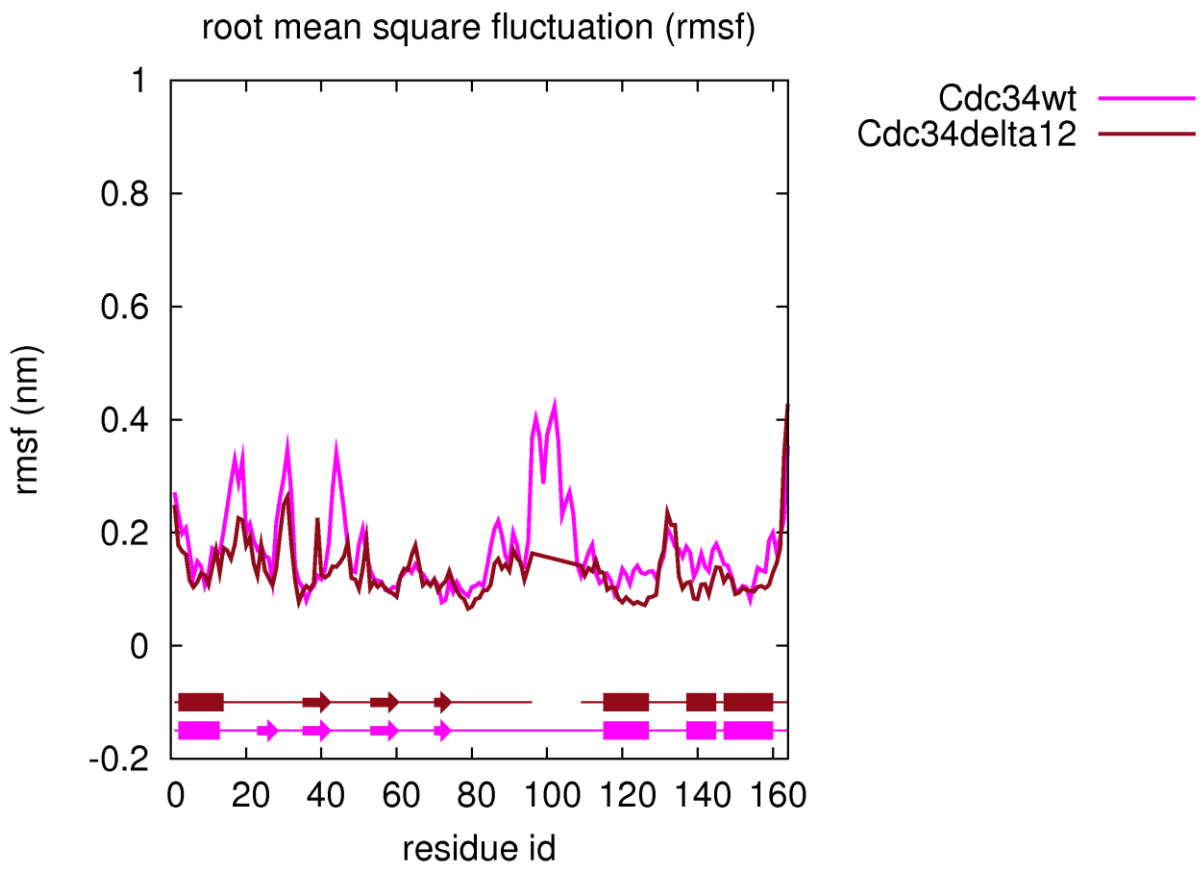

**Figure 8. Model of Cdc34 both in closed (A) and open (B) conformations in complex with Uba1 E1 on the base of the known crystallographic structures of E2-E1 enzymes (PDB codes: 3CMM (Uba1) and 2PX9 (Ubc9 E2 in complex with SAE2 E1) and 2NVU (Ubc12 E2 in complex with Uba3 E1 and Nedd8).**

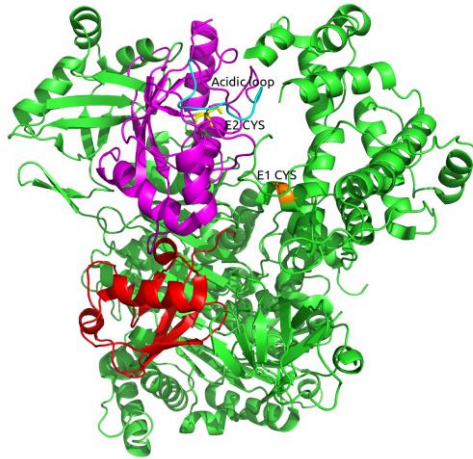

**A**

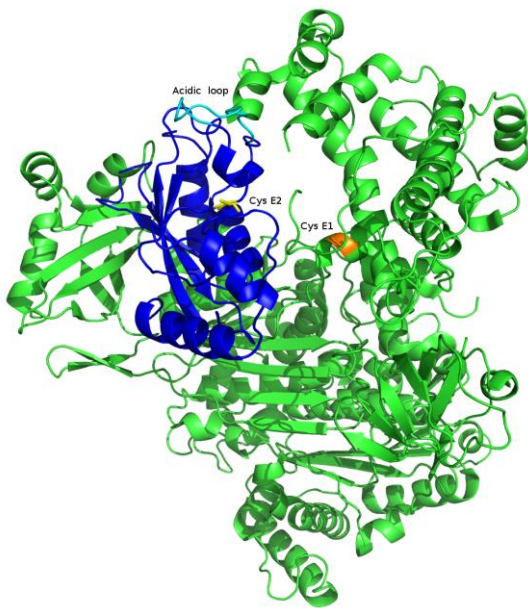

**B**

**Figure 9. Mainchain root mean square deviation of single replicas of each simulated protein system.**

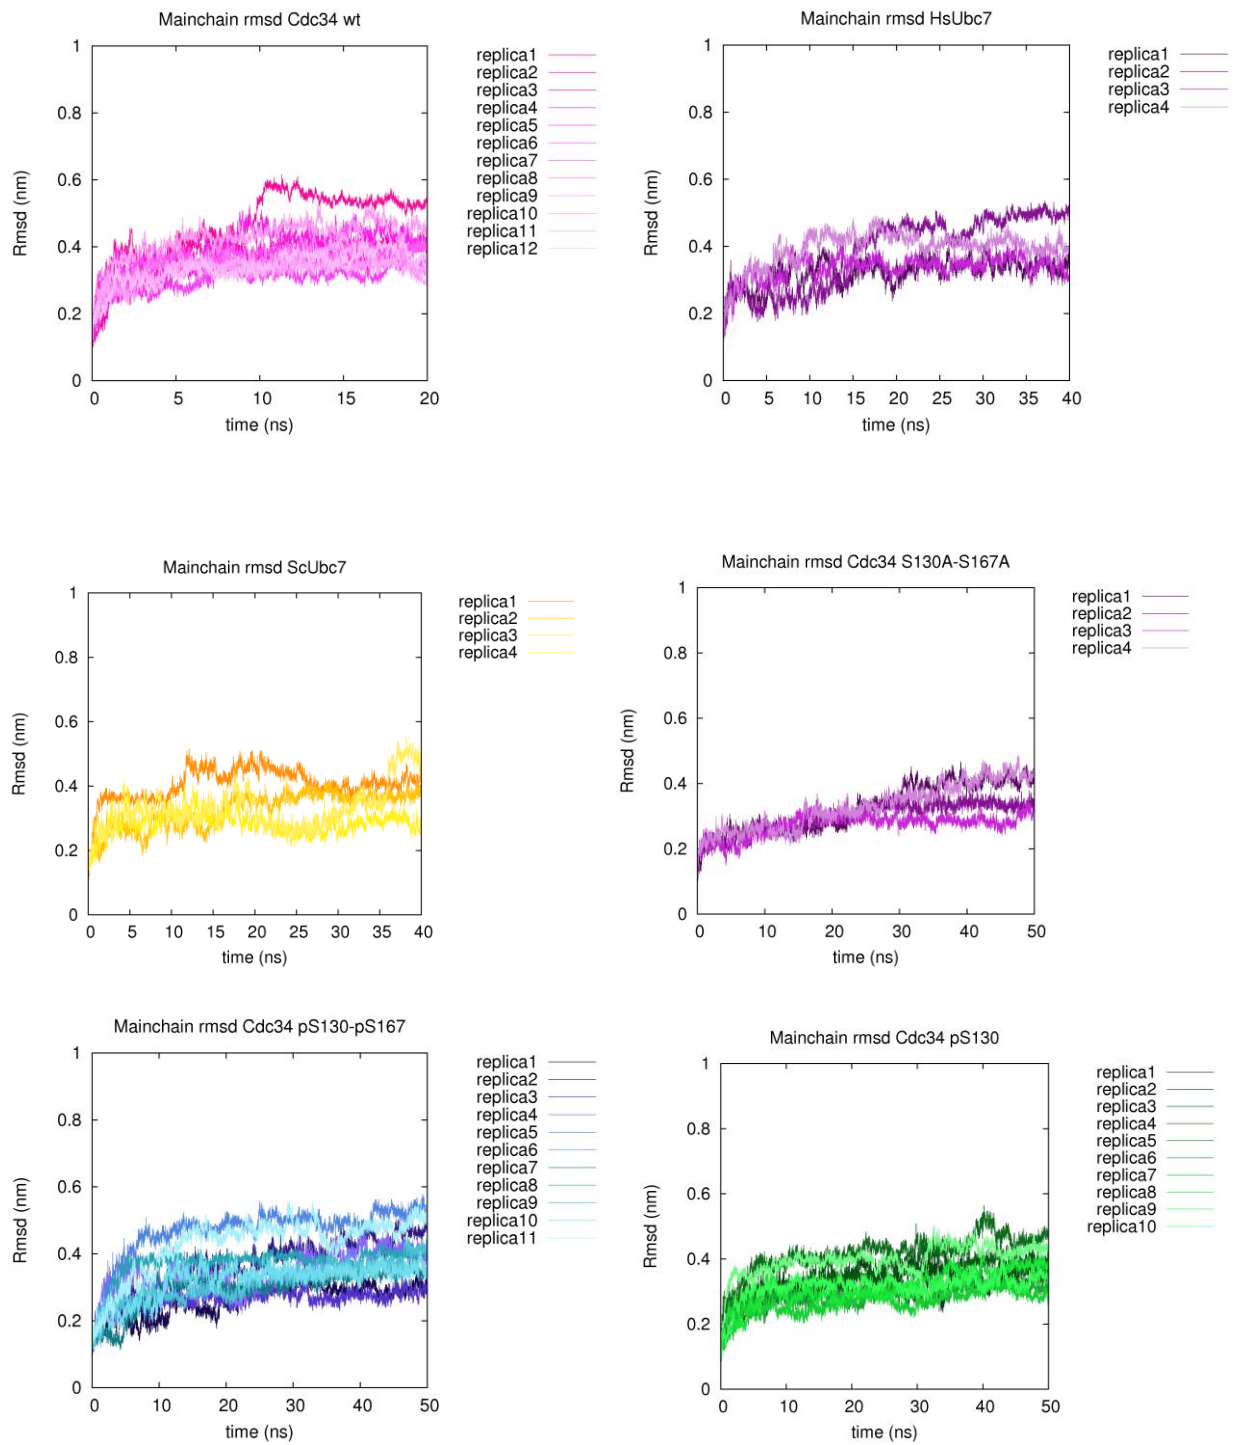

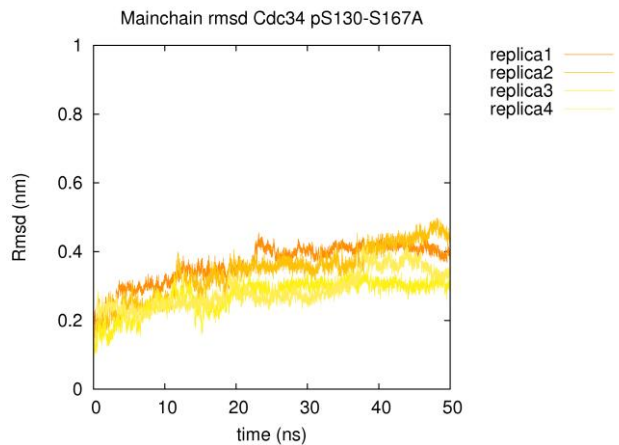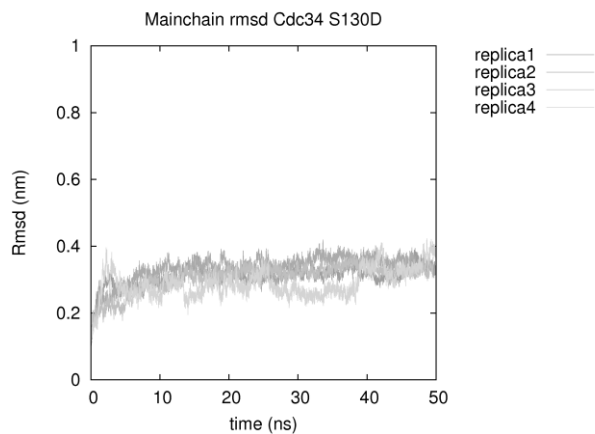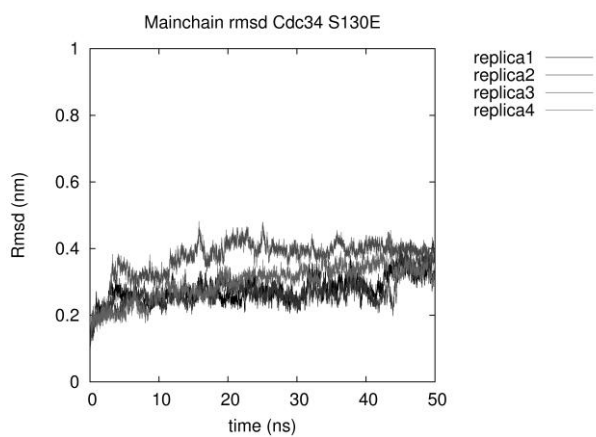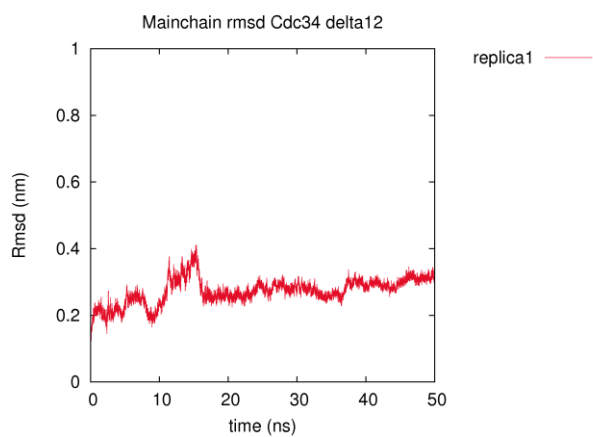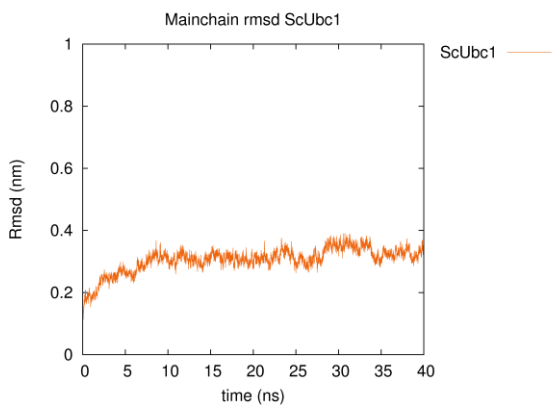

**Figure 10. Mainchain root mean square deviation of the structural elements of the common E2-fold** (the mainchain atoms of the acidic loop are not included in the analysis) of the Cdc34 simulations.

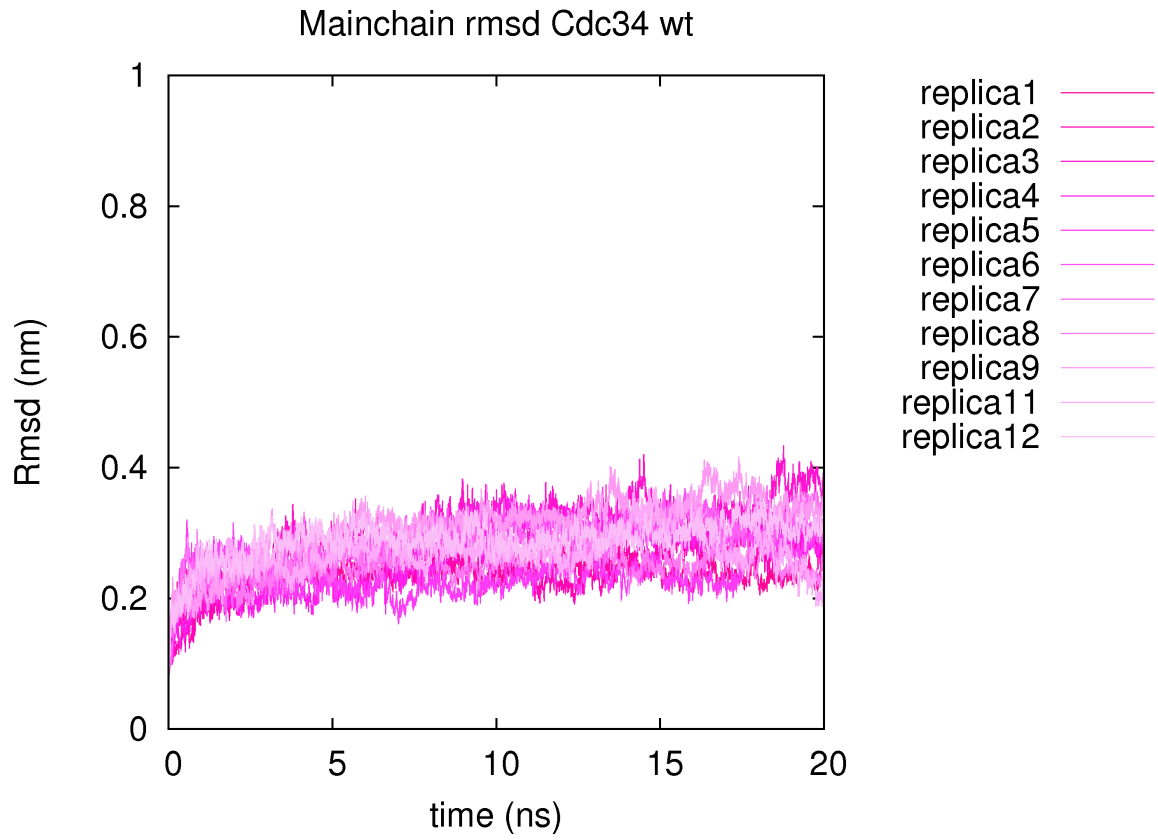

**Figure 11. Cosine content along the first 20 principal components of single replicas and concatenated trajectories of different length for each simulated protein system.**

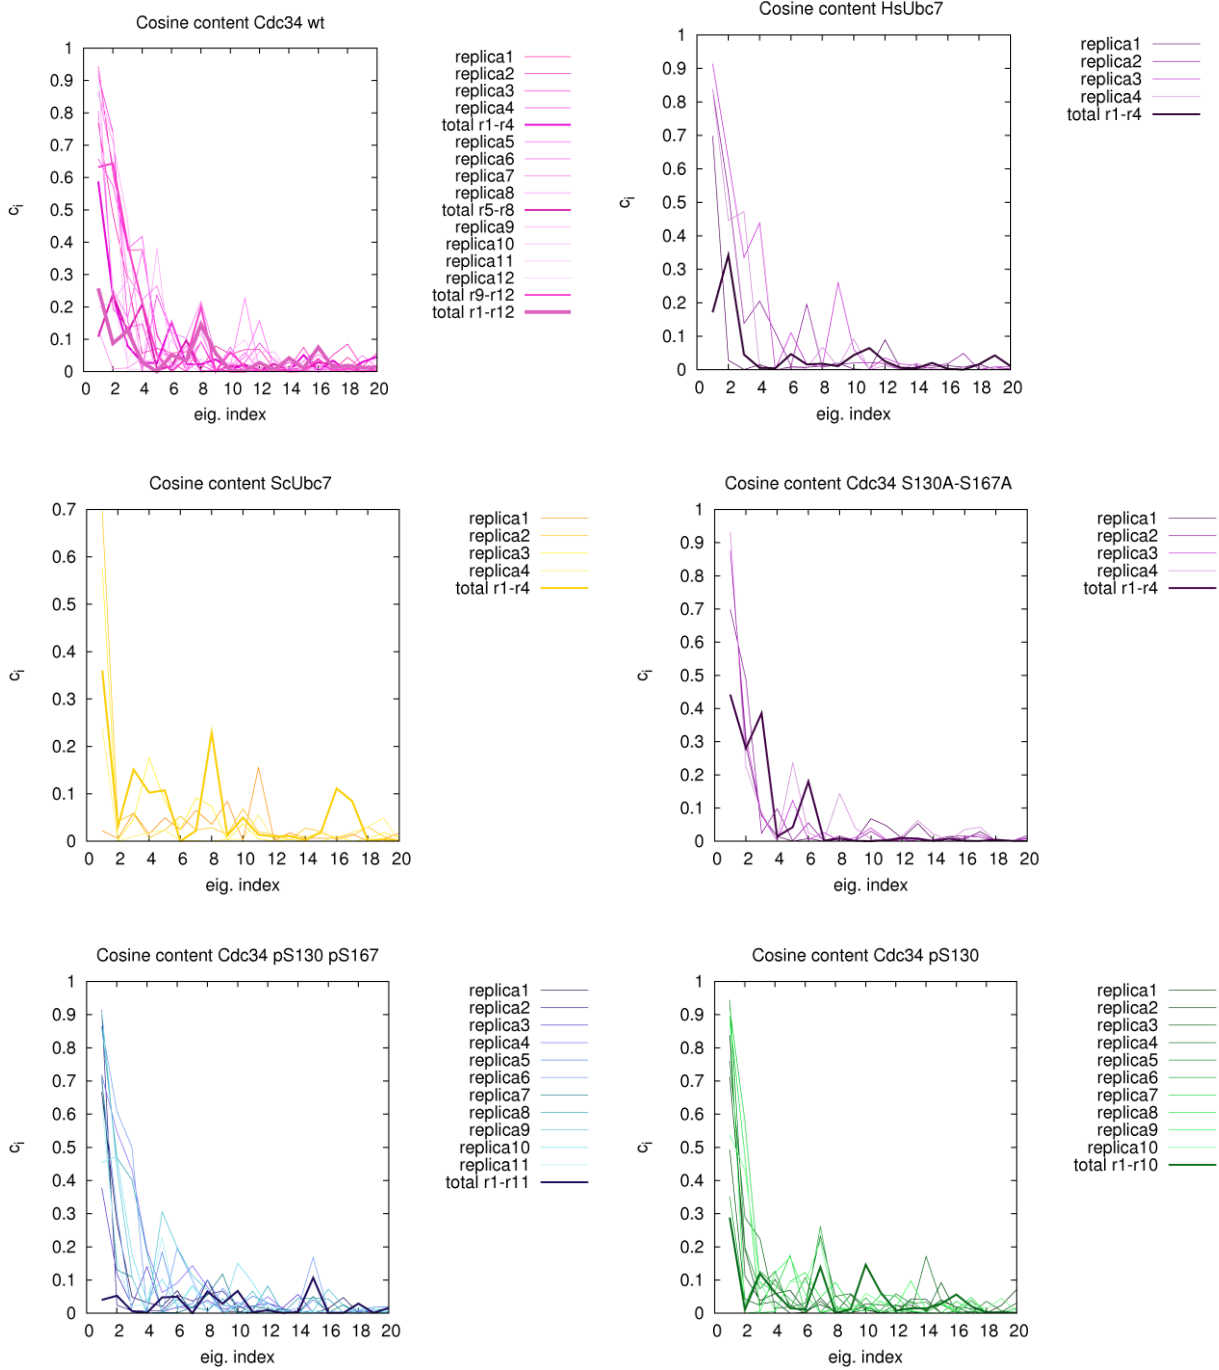



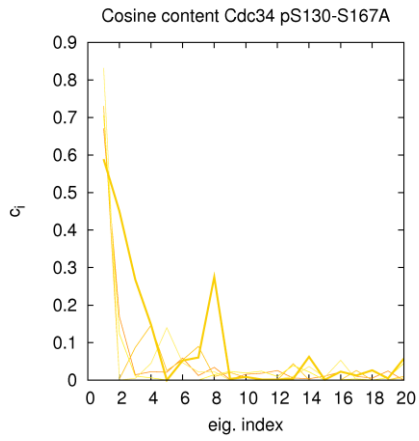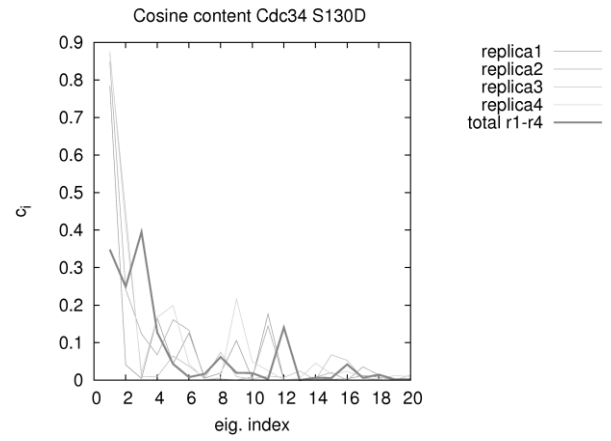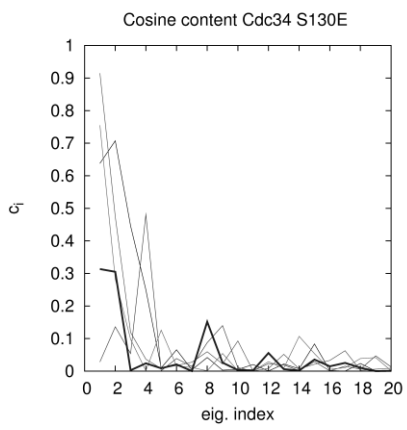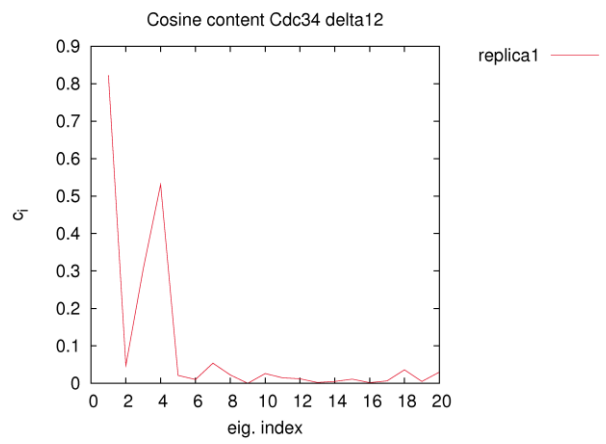

Supplement: pcbi.1002056.s001.pdf [file pcbi.1002056.s001.pdf]
