# Supplementary material for: An Acidic Loop and Cognate Phosphorylation Sites Define a Molecular Switch That Modulates Ubiquitin Charging Activity in Cdc34-Like Enzymes
Source: PLOS journal article supplement (doi:10.1371/journal.pcbi.1002056), 2011-05-26
Supplement: S2 (10.1371/journal.pcbi.1002056.s002) [file journal.pcbi.1002056.s002]

301 Moved Permanently

# Moved Permanently

The document has moved here.

---

Apache Server at www.ploscompbiol.org Port 80
